# Supplementary material for: Reversible and selective amine interactions of [Cd(μ2-N,O-p-NH2C6H4SO3)2(H2O)2]n
Source: Royal Society of Chemistry journal article supplement (doi:10.1039/b400790p), 2004-01-01
Supplement: b400790p.doc [file b400790p.doc]

Fig. S1 IR spectra of [Cd(μ2-p-N,O-NH2C6H4SO3)2(H2O)2]n (**1**) and the amine adducts (**2**-**8**).


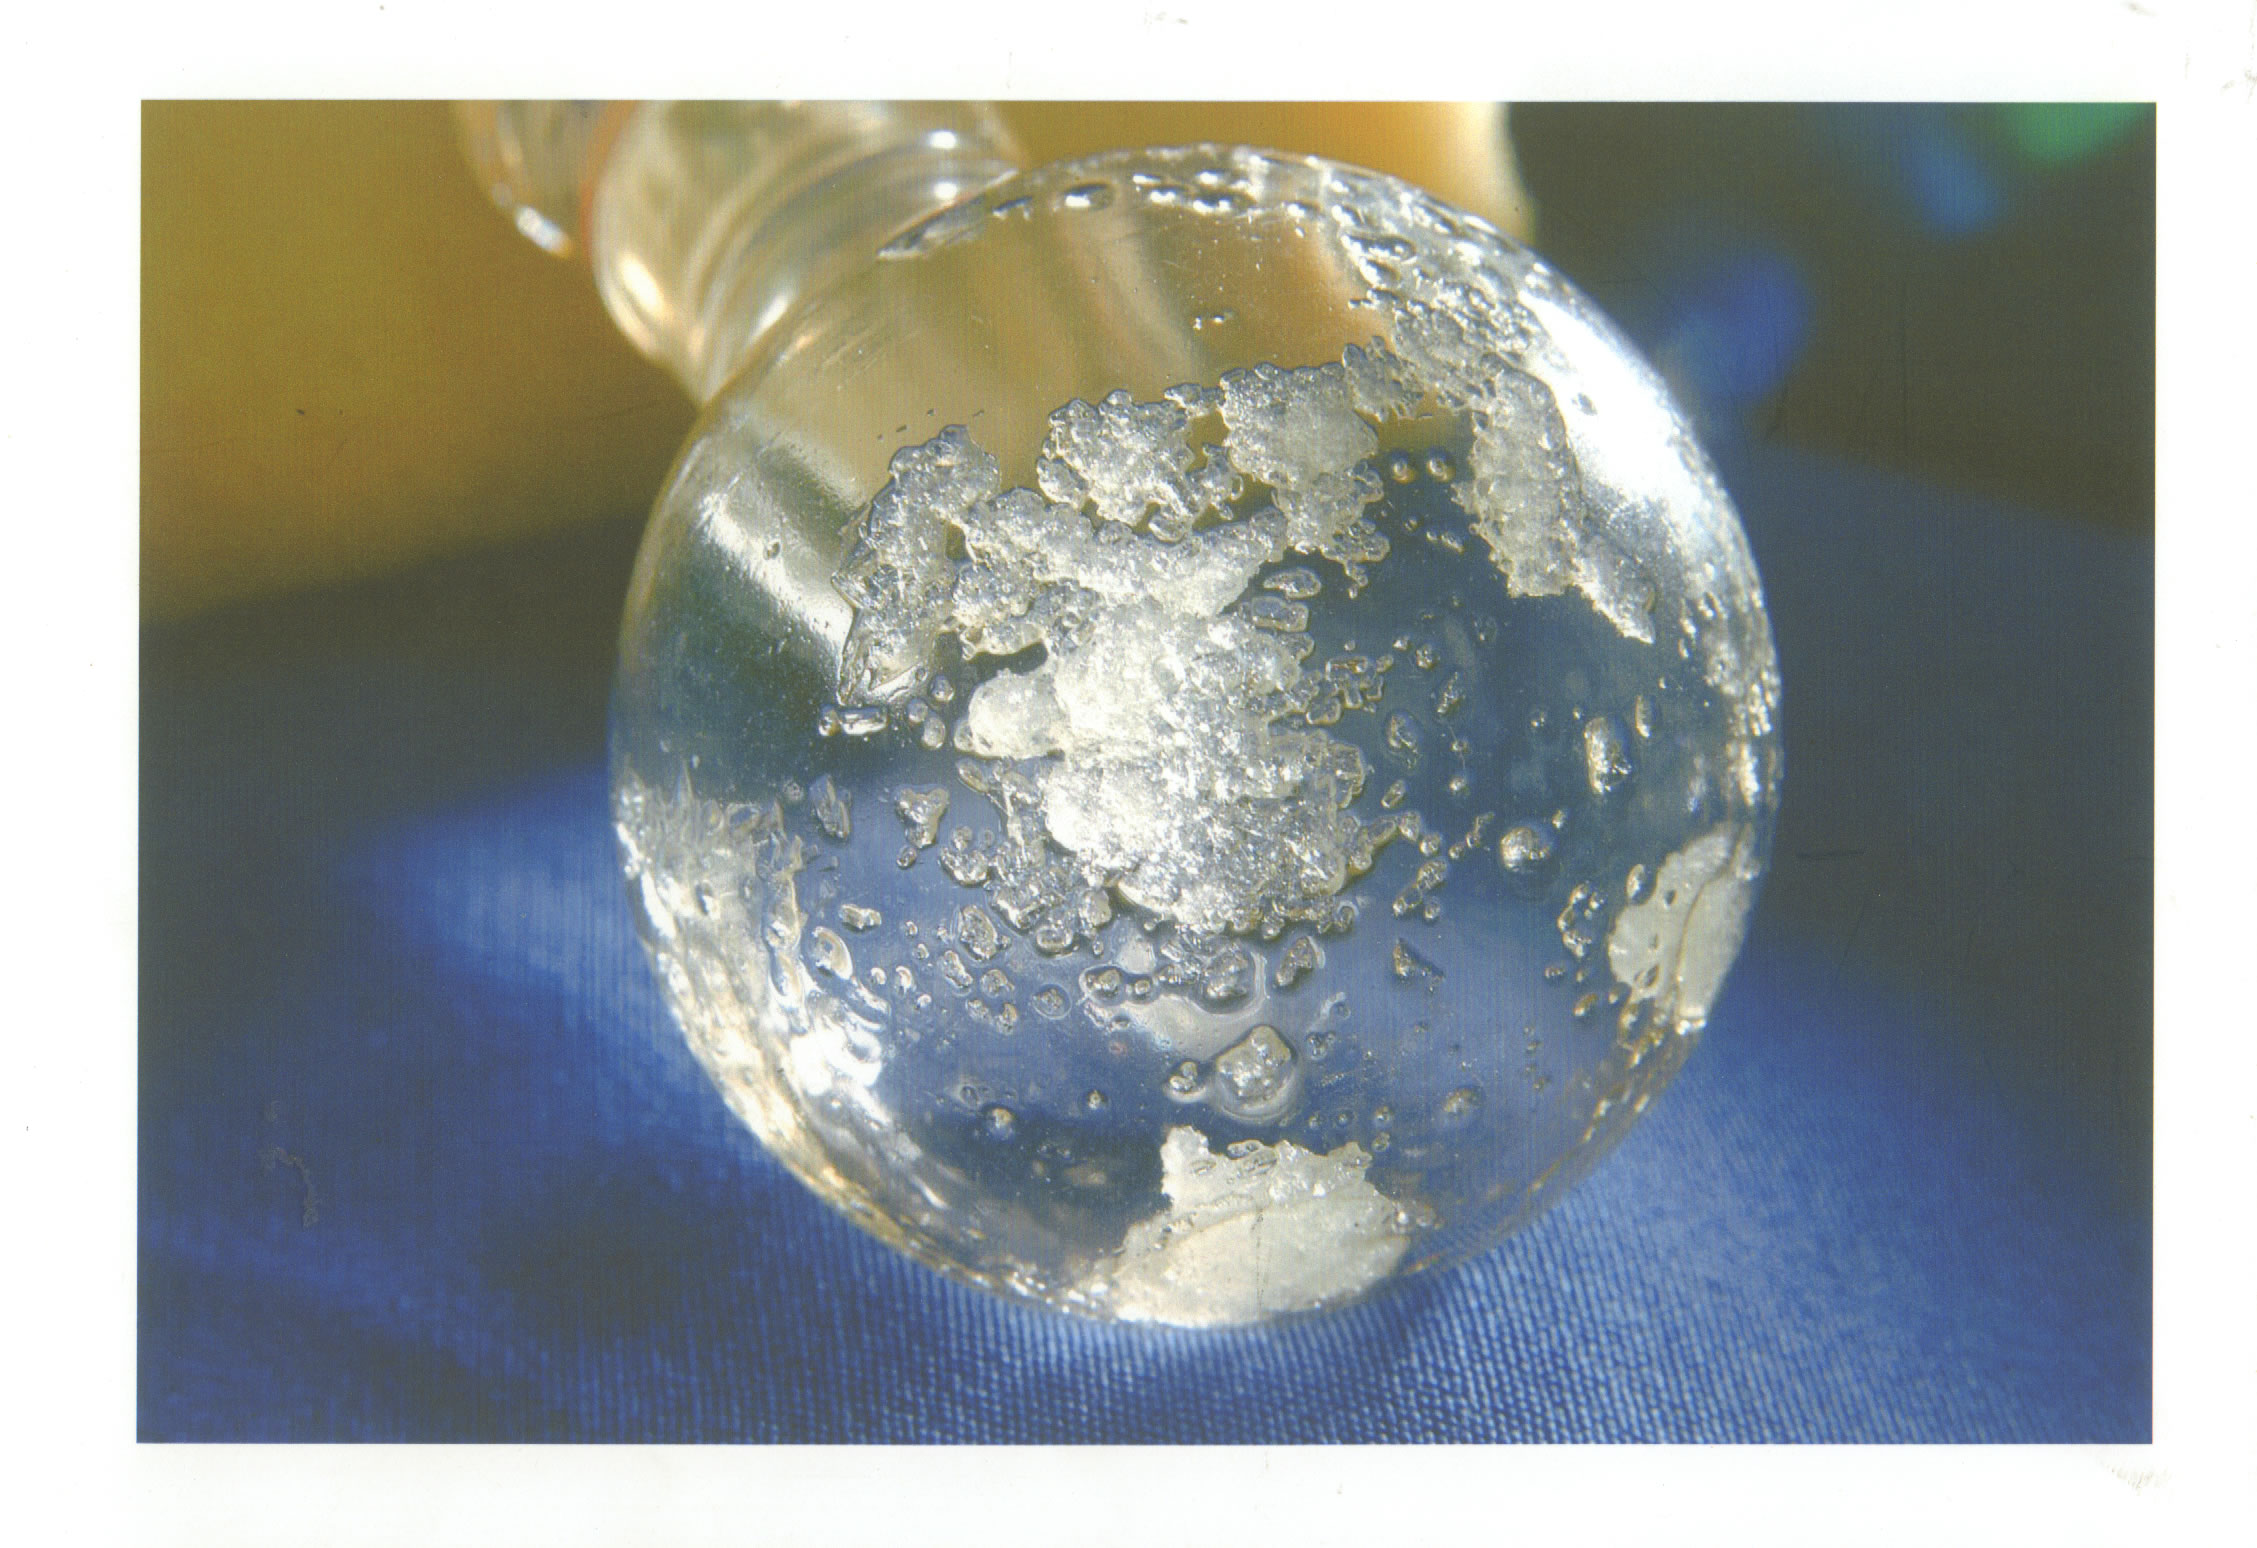


Fig. S2 The reaction vessel contained the C3H7NH2 adduct **4**, showing the wet crystals.

Table S1 Elemental Analyses Results

| no | Composition | Elemental analyses | |
| --- | --- | --- | --- |
| Calc. C, N, H（%） | Obs. C, N, H（%） |
| **1** | Cd(H2NC6H4SO3)2(H2O)2 | 29.25, 5.68, 3.27 | 29.47, 5.72, 3.31 |
| **2** | Cd(H2NC6H4SO3)2(CH3NH2)4 | 31.15, 13.62, 5.88 | 32.20, 13.44, 5.40 |
| **3** | Cd(H2NC6H4SO3)2(H2O)2(C2H5NH2)4 | 35.69, 12.48, 6.59 | 37.07, 12.64, 6.18 |
| **4’** | Cd(H2NC6H4SO3)2(C3H7NH2)2.5* | 36.59, 9.85, 6.02 | 38.80, 10.59, 6.02 |
| **5** | Cd(H2NC6H4SO3)2(H2O)2(iso-C3H7NH2)0.5 | 31.04, 6.70, 3.96 | 31.05, 6.69, 4.17 |
| **6** | Cd(H2NC6H4SO3)2(H2O)2(n-C4H9NH2) | 33.96, 7.42, 4.81 | 33.99, 7.23, 4.58 |
| **7** | Cd(H2NC6H4SO3)2(H2O)2(iso-C4H9NH2)0.5 | 31.77, 6.61, 4.09 | 32.15, 6.64, 4.07 |
| **8** | Cd(H2NC6H4SO3)2(H2O)2(tert-C4H9NH2)1.5 | 35.88, 8.14, 5.44 | 36.19, 8.20, 5.57 |

* According to X-ray structural analysis, the formula should be Cd(H2NC6H4SO3)2(C3H7NH2)5 (**4**).
